# Supplementary material for: Cholinergic muscarinic receptor activation augments murine intestinal epithelial cell proliferation and tumorigenesis
Source: PubMed Central journal article supplement (PMC3640951; doi:10.1186/1471-2407-13-204), 2013-04-24
Supplement: 1471-2407-13-204-S1.pdf [file 1471-2407-13-204-S1.pdf]

---

| <b>Genes</b> | <b>Forward primer sequence 5' to 3'</b> | <b>Reverse primer sequence 5' to 3'</b> |
|--------------|-----------------------------------------|-----------------------------------------|
| <i>Mmp1a</i> | CTATGGATCCAGGTTATCCCA                   | TGTGTTGAACTGATTGGTGAAA                  |
| <i>Mmp7</i>  | CTGTTCCCGGTACTGTGATG                    | TCACAGCGTGTTCCCTCTTTC                   |
| <i>Mmp10</i> | ATGGATAAAGGCTTCCCAAG                    | TGTGATGATCCTCGGAAGAA                    |
| <i>Mmp13</i> | CCGCCTCATAGAAGAGGAAT                    | TTGTTGGCATGACTCTCACA                    |
| <i>Egfr</i>  | CGCAAACACAATAAACTGGAA                   | TCCGAGGAGCATAAAGGATT                    |
| <i>Cox2</i>  | GCAACAGTAGCATCAAACCG                    | TTAGTGGAACCATTCTAGGACAA                 |
| <i>Hif1a</i> | TAGCTTCGCAGAATGCTCAG                    | GAATCCTTTCACTCGTTTCCA                   |
| <i>Chrm1</i> | TCTCTGAATGCTGGAAGTAAAGA                 | GAGACCCTAGATTCAGTCCCA                   |
| <i>Chrm2</i> | AAACCGGTCCAACCTGAG                      | GTCAAGTGGCCAAAGAAACA                    |
| <i>Chrm3</i> | AGGGCTGACTACTTAATCTTGATA                | TGCAAGGTCATTGTGACTCTC                   |
| <i>Chrm4</i> | CAGCGGAGCAAGACAGAAG                     | GCACAGACTGATTGGCTGAG                    |
| <i>Chrm5</i> | TTAAGCTGCTGCTTCTCTGC                    | TTCCAGAGGAGTTGCTAAGG                    |
| <i>Myc</i>   | CAGCAGCGACTCTGAAGAAG                    | GACTCCGACCTCTTGGGA                      |
| <i>Ccnd1</i> | CAACGCACTTTCTTTCCAGA                    | GACTCCAGAAGGGCTTCAAT                    |
| <i>Gapdh</i> | GGTGAAGGTCGGTGTGAAC                     | TGATGGCAACAATCTCCACT                    |

---
